# Supplementary material for: Extraction of actinides by tertiary amines in room temperature ionic liquids: evidence for anion exchange as a major process at high acidity and impact of acid nature
Source: Royal Society of Chemistry journal article supplement (doi:10.1039/c5ra04882f), 2015-01-01
Supplement: c5ra04882f1.pdf [file c5ra04882f1.pdf]

# **Extraction of Actinides by Tertiary Amines in Room Temperature Ionic Liquids: Evidence for Anion Exchange as a Major Process at High Acidity and Impact of Acid Nature**

Seraj A. Ansari<sup>a</sup>, Prasanta K. Mohapatra<sup>a,\*</sup>, V. Mazan<sup>b</sup>, Isabelle Billard<sup>b,c,d\*\*</sup>

<sup>a</sup>: Radiochemistry Division, Bhabha Atomic Research Centre, Trombay, Mumbai-400085, India; <sup>b</sup>: Institut Pluridisciplinaire Hubert Curien, DRS, Radiochemistry Group, CNRS and Strasbourg University, 23 rue du Loess, 67037 Strasbourg cedex 2, France

<sup>c</sup>: Univ. Grenoble Alpes, LEPMI, F-38000 Grenoble, France

<sup>d</sup>: CNRS, LEPMI, F-38000 Grenoble, France (c and d: present addresses)

## **ELECTRONIC SUPPLEMENTARY INFORMATION**

## 1. NMR measurements

The mineral acids was DCl (35%). The internal standard used in  $^1\text{H}$  NMR was trisodium citrate dehydrate (Sigma--Aldrich, 99 %) chosen because its protons are well separated from those of the studied IL cations. The standard used in  $^{19}\text{F}$  NMR was sodium trifluoroacetate (Alfa Aesar, 98 %). 1-methyl-3-octylimidazolium chloride had a purity >97 % (Aldrich) for the T1 measurements.

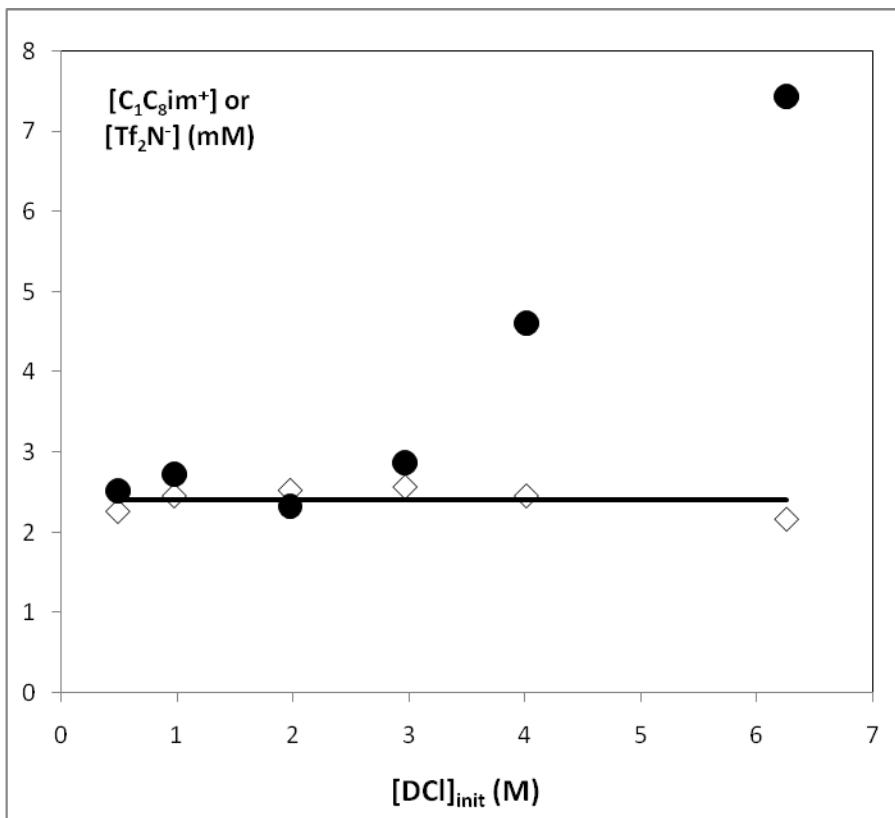

**Fig. S-1: NMR data on C<sub>8</sub>mim<sup>+</sup> (closed circle) and Tf<sub>2</sub>N<sup>-</sup> (empty diamond)**

## 2. Titration data

**Table 1:** Acid uptake by pure IL

| Acid             | C <sub>4</sub> mimTf <sub>2</sub> N | C <sub>6</sub> mimTf <sub>2</sub> N | C <sub>8</sub> mimTf <sub>2</sub> N |
|------------------|-------------------------------------|-------------------------------------|-------------------------------------|
| HCl              | No solubilization                   | No solubilization                   | No solubilization                   |
| HNO <sub>3</sub> | 6% solubilization                   | 6% solubilization                   | 5% solubilization                   |
